# Supplementary material for: Mining of Thousands of Prokaryotic Genomes Reveals High Abundance of Prophages with a Strictly Narrow Host Range
Source: PubMed Central journal article supplement (PMC9426530; doi:10.1128/msystems.00326-22), 2022-07-26

No\_prophages

0

5

10

15

Acinetobacter

\*\*

Anoxybacillus

Bacillus

\*\*

\*\*

\*\*

Brevibacillus

\*\*

\*\*

\*\*

Exiguobacterium

Geobacillus

Listeria

Lysinibacillus

\*\*

\*\*

Moraxella

Paenibacillus

\*

\*

Planococcus

Pseudomonas

\*

Psychrobacter

Staphylococcus

Virgibacillus

Genus

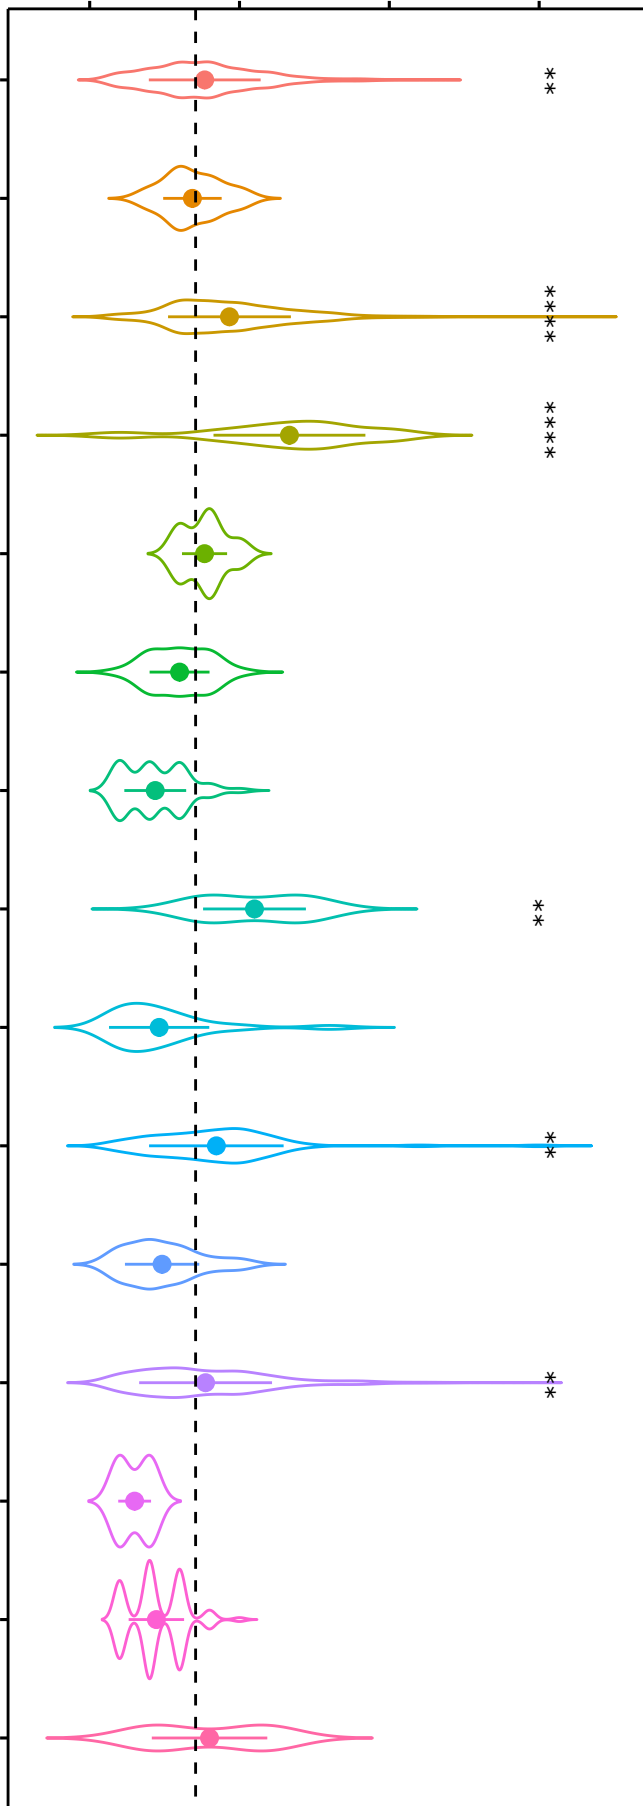

Supplement: msystems.00326-22-s0004.pdf [file msystems.00326-22-s0004.pdf]
