# Supplementary material for: Mining of Thousands of Prokaryotic Genomes Reveals High Abundance of Prophages with a Strictly Narrow Host Range
Source: PubMed Central journal article supplement (PMC9426530; doi:10.1128/msystems.00326-22), 2022-07-26

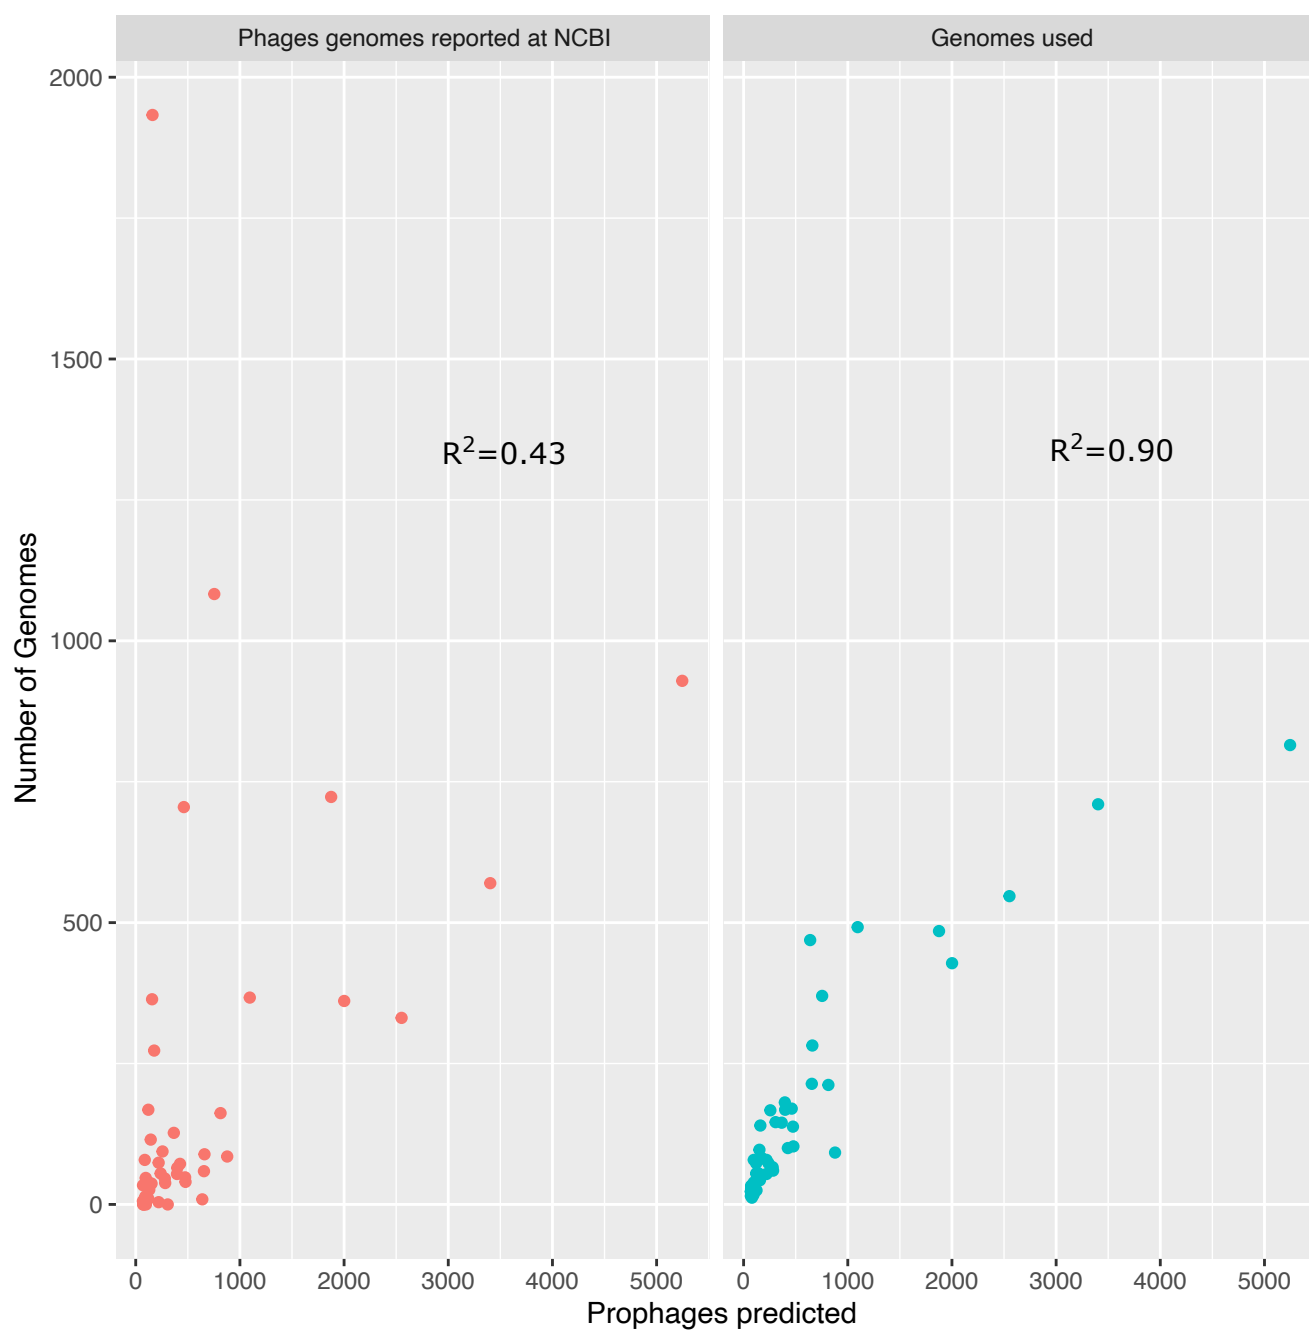

Supplement: msystems.00326-22-s0005.pdf [file msystems.00326-22-s0005.pdf]
