# Supplementary material for: Mining of Thousands of Prokaryotic Genomes Reveals High Abundance of Prophages with a Strictly Narrow Host Range
Source: PubMed Central journal article supplement (PMC9426530; doi:10.1128/msystems.00326-22), 2022-07-26
Supplement: msystems.00326-22-s0010.pdf [file msystems.00326-22-s0010.pdf]

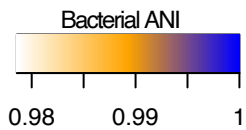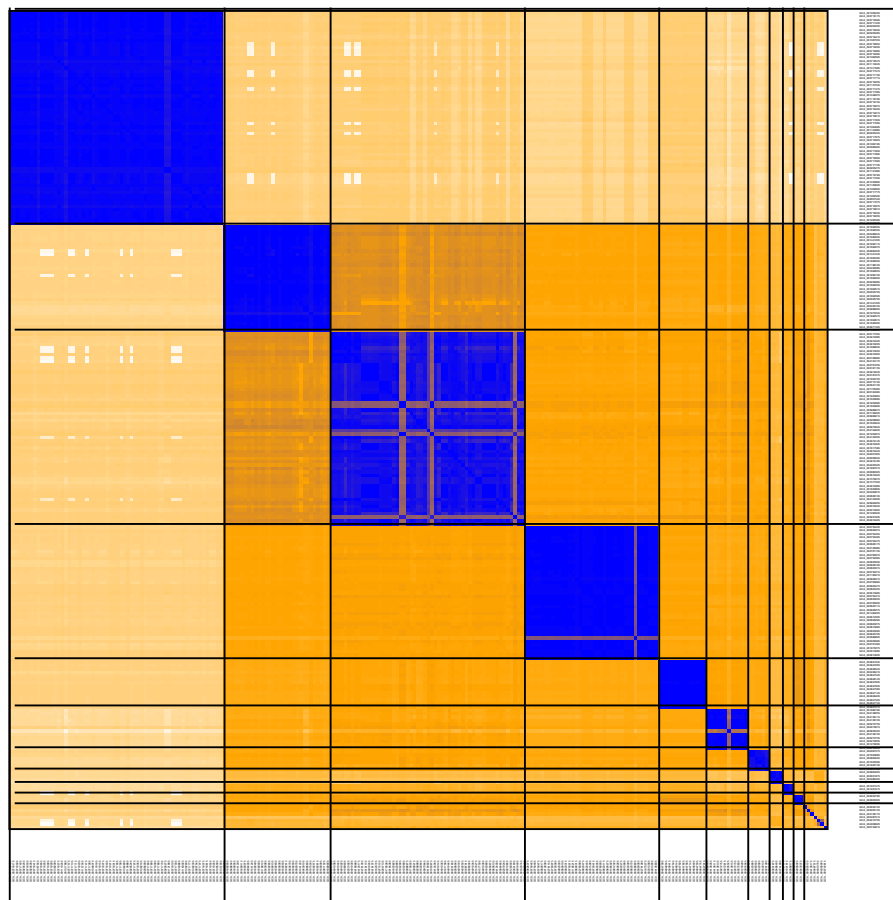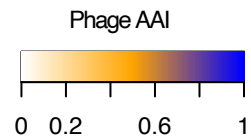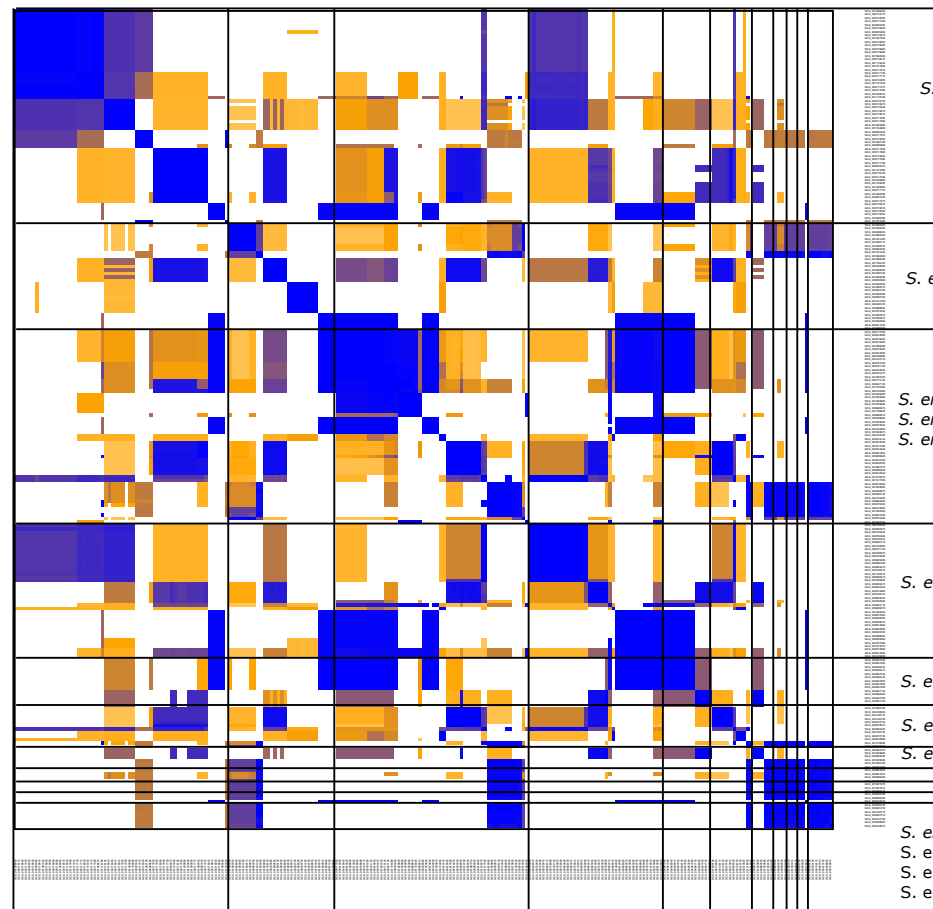

*S. enterica* serovar Thypi

*S. enterica* serovar Heidelberg

*S. enterica* serovar Typhimurium  
*S. enterica* serovar Enteritidis  
*S. enterica* serovar Saintpaul

*S. enterica* serovar Enteritidis

*S. enterica* serovar Bareilly

*S. enterica* serovar Newport

*S. enterica* serovar Anatum  
*S. enterica* serovar Montevideo and *S. enterica* serovar Tennessee  
*S. enterica* serovar Infantis  
*S. enterica* serovar Thompson

*S. enterica* serovar Newport  
*S. enterica* serovar Albany  
*S. enterica* serovar Goldcoast  
*S. enterica* serovar Choleraesuis
